# Supplementary material
Source: publisher site journal article supplement (https://www.dovepress.com/article/508357)
Supplement: Supplementary file 1 [file get_supplementary_file.php]

Table S1 MR liver acquisition protocol

| Sequence | TR/TE (ms) | FOV (mm) | Matrix | Slice thickness (mm) | Slices |
| --- | --- | --- | --- | --- | --- |
| T2WI | 8000/93.5 | 380×380 | 460×576 | 4 | 24 |
| IVIM-DWI | 4582 /67.1 | 236× 320 | 160 × 118 | 5 | 30 |
| T1WI/CE-T1WI | 3.5/1.6 | 380×280 | 318×380 | 3 | 64 |

TR, repetition time; TE, echo time; FOV, field of view; DWI, diffusion weighted imaging; T1WI, T1-weighted imaging; T2WI, T2-weighted imaging; CE-T1WI, contrast enhanced T1-weighted imaging.

Table S2 Description of imaging features

| Characteristic | Description |
| --- | --- |
| Number | Defined as 1 when the number equals 1, otherwise defined 2 when number greater than or equal to 2. |
| Maximum tumor diameter (mm) | Defined as the largest outer-edge-to-outer-edge dimension on the transverse section in the venous phase |
| AP enhancement type | Type 1 (nonrim APHE), type 2 (rim APHE), type 3 (homogeneous enhancement), type 4 (without APHE) |
| Internal or peripheral artery | Defined as presence of discrete arterial enhancement within or around the tumor on arterial phase |
| AP peritumoral enhancement | Defined as hyperintensity in the arterial phase, which becomes isointensity on the venous/delayed phase |
| Boundary of the tumor enhancement | Defined as clear or obscure in the arterial phase |
| Nonperipheral washout | Defined that apparent washout is not most pronounced in the periphery of the observation |
| Capsule appearance | Peripheral rim of uniform and smooth hyperenhancement in the portal or delayed phase, which is categorized into three groups (absent, incomplete, and complete) |
| Tumor margin | Defined as the following four types: nodular with extranudular extension, multinudular confluent, infiltrative shaped tumor, smooth margin |
| Satellite nodules | Defined as small (< 2 cm) tumor nodules close (< 2 cm) to the border of the main tumor |
| Necrosis | Classified as nonenhanced area |
| Intratumoral hemorrhage | Defined as hyperintensity on pre-contrast MRI |

AP, arterial phase; APHE, APHE, arterial phase hyperenhancement; MRI, magnetic resonance imaging.

Table S3 Predictive features identified by feature selection of IVIM parameter images radiomics model

| Features | Coefficient | ICC |
| --- | --- | --- |
| Dt__original_shape_MeshVolume | -8.919E-06 | 0.931 |
| Dt__original_glszm_ZoneVariance | 5.562E-04 | 0.988 |
| Dt__exponential_firstorder_Energy | -2.592E-04 | 0.843 |
| Dt__lbp-3D-k_ngtdm_Busyness | 4.375E-04 | 0.754 |
| Dt__square_firstorder_Kurtosis | 4.214E-03 | 0.987 |
| Dt__wavelet-LLH_gldm_LargeDependenceHighGrayLevelEmphasis | -3.194E-03 | 0.926 |
| Dt__wavelet-LLL_gldm_LargeDependenceLowGrayLevelEmphasis | -1.988E-03 | 0.830 |
| Dt__wavelet-LLL_glszm_LargeAreaLowGrayLevelEmphasis | 2.210E-08 | 0.804 |
| Dp__lbp-3D-k_gldm_LargeDependenceEmphasis | 7.825E-04 | 0.984 |
| Dp__lbp-3D-k_gldm_LargeDependenceHighGrayLevelEmphasis | -1.380E-04 | 0.905 |
| Dp__lbp-3D-k_ngtdm_Busyness | -2.033E-06 | 0.830 |
| Dp__wavelet-LLH_gldm_LargeDependenceEmphasis | -1.625E-05 | 0.970 |
| Dp__wavelet-LLH_gldm_LargeDependenceLowGrayLevelEmphasis | -9.144E-05 | 0.973 |
| f__lbp-3D-k_gldm_LargeDependenceEmphasis | -1.704E-07 | 0.944 |
| f__lbp-3D-k_gldm_LargeDependenceHighGrayLevelEmphasis | 5.393E-03 | 0.889 |
| f__lbp-3D-k_ngtdm_Busyness | -9.263E-06 | 0.936 |
| f__wavelet-LLH_gldm_LargeDependenceHighGrayLevelEmphasis | -2.525E-08 | 0.963 |
| f__wavelet-LLH_gldm_LargeDependenceLowGrayLevelEmphasis | -1.486E-03 | 0.933 |
| f__wavelet-LLL_gldm_LargeDependenceLowGrayLevelEmphasis | 8.970E-04 | 0.854 |
| ADC__wavelet-LLH_gldm_LargeDependenceHighGrayLevelEmphasis | -8.813E-04 | 0.951 |
| ADC__wavelet-LLL_gldm_LargeDependenceHighGrayLevelEmphasis | -3.748E-04 | 0.761 |
| ADC__wavelet-LLL_gldm_LargeDependenceLowGrayLevelEmphasis | 4.725E-04 | 0.769 |

ADC, apparent diffusion coefficient; Dt, true diffusion coefficient; Dp, perfusion related diffusion coefficient; f, perfusion fraction

Table S4 Delong test results of the four models, related to results.

|  | *P* value | |
| --- | --- | --- |
| Models | Training cohort | Testing cohort |
| Combined model vs Clinical factors | <0.001 | 0.184 |
| Combined model vs IVIM parameters | <0.001 | 0.227 |
| Combined model vs All_radscore | 0.009 | 0.445 |
| Clinical factors vs IVIM parameters | 0.429 | 0.991 |
| Clinical factors vs All_radscore | 0.210 | 0.533 |
| All_radscore vs IVIM parameters | 0.566 | 0.372 |

IVIM, intravoxel incoherent motion.
